# Supplementary material
Source: PubMed Central journal article supplement (PMC8711033)
Supplement: NIHMS1758431-supplement-2.pdf [file NIHMS1758431-supplement-2.pdf]

459  
460  
461

**Supplemental Table 1. Propensity score for predicting ketamine use in sepsis patients**

| <b>Factor</b>                                                                 | <b>aOR (95% CI)</b>        |
|-------------------------------------------------------------------------------|----------------------------|
| Habitus                                                                       |                            |
| Very Thin                                                                     | <b>0.787 (0.537-1.152)</b> |
| Thin                                                                          | <b>0.797 (0.596-1.065)</b> |
| Normal                                                                        | <b>0.663 (0.511-0.861)</b> |
| Obese                                                                         | <b>0.619 (0.475-0.806)</b> |
| Morbidly Obese                                                                | <b>Ref</b>                 |
| Emergency intubation (e.g., unable to pre-oxygenate)                          | <b>0.841 (0.726-0.973)</b> |
| Oxygen saturation at start of intubation (per 1% change in SpO <sub>2</sub> ) | <b>1.003 (0.995-1.011)</b> |
| Pre-Intubation Blood Pressure                                                 |                            |
| Hypertensive                                                                  | <b>0.279 (0.219-0.356)</b> |
| Normal                                                                        | <b>0.327 (0.259-0.413)</b> |
| Hypotensive with No Treatment                                                 | <b>0.656 (0.459-0.939)</b> |
| Hypotensive with Intravenous Fluids                                           | <b>0.830 (0.634-1.085)</b> |
| Hypotensive with Vasopressors                                                 | <b>Ref</b>                 |
| Anticipated Difficult Airway                                                  | <b>1.731 (1.506-1.990)</b> |
| Training Level                                                                |                            |
| PGY1                                                                          | <b>1.239 (0.848-1.811)</b> |
| PGY2                                                                          | <b>1.281 (0.902-1.819)</b> |
| PGY3                                                                          | <b>0.805 (0.565-1.146)</b> |
| PGY4                                                                          | <b>0.946 (0.630-1.421)</b> |
| PGY5 >= or fellow                                                             | <b>1.284 (0.804-2.049)</b> |
| Attending                                                                     | <b>Ref</b>                 |

462  
463  
464

465 **Supplemental Table 2. Full propensity score-adjusted model predicting**  
466 **hypotension**  
467

| <b>Factor</b>            | <b>OR (95% CI)<br/>Unadjusted</b> | <b>aOR (95% CI)<br/>Adjusted</b> |
|--------------------------|-----------------------------------|----------------------------------|
| Ketamine (ref=etomidate) | <b>2.9 (1.9-4.5)</b>              | <b>2.7 (1.1-6.7)</b>             |
| Propensity Score         |                                   | <b>0.2 (0.1-15.0)</b>            |

468
